# Supplementary material
Source: PubMed Central journal article supplement (PMC8091831)
Supplement: JCM.02047-20-s0001.pdf [file JCM.02047-20-s0001.pdf]

## 1 **SUPPLEMENTAL MATERIAL**

### 2 **Supplementary Material and Methods**

#### 3 **MeV-specific PCR and genotyping**

4 For the PCR analyses, viral nucleic acid was extracted from 200 µl of clinical sample using  
5 the automated NucliSens EasyMag extractor, according to the manufacturer's instructions  
6 (Biomérieux, Marcy l'Etoile, France). For the detection of MeV RNA, a primer and probe mix  
7 (LightMix®Modular Measles Kit, Tib-MolBiol, Berlin, Germany) was used (1). The PCR  
8 assays were validated using proficiency panels from QCMD (Quality Control for Molecular  
9 Diagnostics, Glasgow, United Kingdom), NEQAS (National External Quality Assessment  
10 Service, Sheffield, United Kingdom) and Instand (Instand, Düsseldorf, Germany). All PCR  
11 positive samples were genotyped, confirming infection with the wild virus (2).

12

#### 13 **IgG and avidity testing**

14 EUROIMMUN Anti-Measles Virus IgG ELISA (Euroimmun, Lübeck, Germany) was used for  
15 quantification of MeV IgG antibodies and performed according to the manufacturers'  
16 instructions (3). Results were classified as negative if IgG titer was <200 IU/L, 200-275 IU/L  
17 as borderline and >275 IU/L as positive. Additionally, MeV IgG avidity was measured using  
18 the above-mentioned IgG ELISA (Euroimmun, Lübeck, Germany) according to the  
19 manufacturers' instructions. Low avidity, borderline avidity and high avidity were defined as  
20 avidity <40%, 40-60% and >60%, respectively.

21

#### 22 **Neutralization test (NT)**

23 An in-house NT was used to assess MeV neutralizing antibodies. In brief, two-fold serial  
24 dilutions of heat-inactivated serum samples were incubated with 50-100 TCID<sub>50</sub> MeV strain  
25 B3 for 1h at 37 °C before the mixture was added to confluent Vero-SLAM cell monolayers.  
26 Incubation was continued for four days. The presence of virus in the supernatant was  
27 assessed by the occurrence of cytopathic effects. NT titers  $\geq 10$  were considered positive.  
28 The NT was calibrated using the World Health Organization (WHO) 3rd International  
29 Standard Anti-Measles Serum (National Institute for Biological Standards and Control,  
30 NIBSC, Code 97/648), and an NT titer of 10 is equivalent to a concentration of 120 mIU/ml.

31

### 32 **IgM antibody testing for other viral infections in control samples**

33 All 153 samples from controls without MeV infection (group= 3) were tested for Epstein Barr  
34 Virus (EBV)- and Parvovirus B19 (B19)-specific IgM antibodies using the Euroimmun Anti-  
35 EBV-CA-IgM ELISA and the Anti-B19V-IgM ELISA (both Euroimmun, Lübeck, Germany)  
36 according to the manufacturers' instructions using the recommended cutoffs.

37

### 38 **Ethics**

39 The study was approved by the ethics committee of the Medical University of Vienna (EK  
40 2156/2019) and performed in accordance with the Declaration of Helsinki (2013). Since the  
41 samples had been acquired for virological diagnosis and had already been anonymized when  
42 they were integrated into the sample bank of the Center of Virology for research, the local  
43 ethics committee concluded that no written informed consent from the patients was required  
44 (EK 1035/2016, EK 1513/2016).

45 **Supplementary Table S1.** Serological profiles in patients with primary infection and  
 46 suspected reinfection regarding their quantitative levels of IgG antibodies, IgG avidity, and  
 47 neutralizing antibodies.

48

|                | <b>Primary infection,<br/>Group 1 (n=187)</b> | <b>Suspected<br/>reinfection, Group 2<br/>(n=30)</b> | <b>P value</b> | 49 |
|----------------|-----------------------------------------------|------------------------------------------------------|----------------|----|
| IgG, IU/L      | 121 (64-249)                                  | 2881 (1359-4920)                                     | <0.001         | 50 |
| IgG avidity, % | 15.9 (12.8-20.7)                              | 80.5 (70.3-90.0)                                     | <0.001         | 51 |
| NT titers      | 35 (20-60)                                    | 480 (150-1280)                                       | <0.001         | 52 |

53 Abbreviations: IU/L: international units per liter, NT: neutralization assay

54 **Supplementary Table S2.** Characterization of available reverse transcriptase polymerase  
 55 chain reaction (RT-PCR) results in groups 1-3.

|                                                       |                      | PCR from serum | PCR from oral<br>fluid/throat swap | PCR from urine |
|-------------------------------------------------------|----------------------|----------------|------------------------------------|----------------|
| <b>Primary<br/>infection,<br/>Group 1<br/>(n=187)</b> | Available (% of all) | 187 (100%)     | 82 (43.9%)                         | 55 (29.4%)     |
|                                                       | Positive result      | 177            | 82                                 | 55             |
|                                                       | Negative result      | 10             | 0                                  | 0              |
| <b>Suspected<br/>reinfection,<br/>Group 2 (n=30)</b>  | Available (% of all) | 30 (100%)      | 14 (46.7%)                         | 13 (43.3%)     |
|                                                       | Positive result      | 24             | 14                                 | 13             |
|                                                       | Negative result      | 6              | 0                                  | 0              |
| <b>Controls, Group<br/>3 (n=153)</b>                  | Available (% of all) | 153 (100%)     | 24 (15.7%)                         | 14 (9.2%)      |
|                                                       | Positive result      | 0              | 0                                  | 0              |
|                                                       | Negative result      | 153            | 24                                 | 14             |

56

57 **Supplementary Table S3.** Comparison of agreement between the IgM ELISAs **(A)** in the  
 58 overall cohort (n=370), **(B)** in primary infection setting (n=236) and **(C)** in the setting of high  
 59 Anti-MeV-IgG avidity (n=134), using Cohen's  $\kappa$ .

60 **(A)**

|        |   | Test B |   |     | 61 |
|--------|---|--------|---|-----|----|
|        |   | -      | ~ | +   | 62 |
| Test A | - | 138    | 9 | 34  |    |
|        | ~ | 12     | 1 | 9   |    |
|        | + | 10     | 0 | 157 |    |

|        |   | Test C |   |     |
|--------|---|--------|---|-----|
|        |   | -      | ~ | +   |
| Test B | - | 148    | 7 | 5   |
|        | ~ | 5      | 1 | 4   |
|        | + | 8      | 3 | 189 |

65

66 Cohen's  $\kappa=0.632$ ,  $p<0.001$

Cohen's  $\kappa=0.834$ ,  $p<0.001$

67

|        |   | Test C |   |     | 68 |
|--------|---|--------|---|-----|----|
|        |   | -      | ~ | +   | 69 |
| Test A | - | 140    | 8 | 33  |    |
|        | ~ | 13     | 0 | 9   |    |
|        | + | 8      | 3 | 156 |    |

|        |   | Test D |   |     |
|--------|---|--------|---|-----|
|        |   | -      | ~ | +   |
| Test B | - | 138    | 1 | 21  |
|        | ~ | 8      | 1 | 1   |
|        | + | 18     | 5 | 177 |

72

73 Cohen's  $\kappa=0.632$ ,  $p<0.001$

Cohen's  $\kappa=0.718$ ,  $p<0.001$

74

75

|        |   | Test D |   |     | 76 |
|--------|---|--------|---|-----|----|
|        |   | -      | ~ | +   |    |
| Test A | - | 140    | 5 | 36  | 77 |
|        | ~ | 10     | 0 | 12  |    |
|        | + | 14     | 2 | 151 |    |

80

81 Cohen's  $\kappa=0.604$ ,  $p<0.001$

|        |   | Test D |   |     |
|--------|---|--------|---|-----|
|        |   | -      | ~ | +   |
| Test C | - | 142    | 2 | 17  |
|        | ~ | 4      | 1 | 6   |
|        | + | 18     | 4 | 176 |

Cohen's  $\kappa=0.734$ ,  $p<0.001$

82 (B)

|        |   | Test B |   |     | 83 |
|--------|---|--------|---|-----|----|
|        |   | -      | ~ | +   |    |
| Test A | - | 54     | 6 | 22  | 84 |
|        | ~ | 5      | 0 | 8   |    |
|        | + | 4      | 0 | 137 |    |

|        |   | Test C |   |     |
|--------|---|--------|---|-----|
|        |   | -      | ~ | +   |
| Test B | - | 59     | 2 | 2   |
|        | ~ | 3      | 0 | 3   |
|        | + | 4      | 2 | 161 |

87

88 Cohen's  $\kappa=0.605$ ,  $p<0.001$

Cohen's  $\kappa=0.841$ ,  $p<0.001$

89

|        |   | Test C |   |     | 90 |
|--------|---|--------|---|-----|----|
|        |   | -      | ~ | +   |    |
| Test A | - | 59     | 2 | 21  | 91 |
|        | ~ | 5      | 0 | 8   |    |
|        | + | 2      | 2 | 137 |    |

|        |   | Test D |   |     |
|--------|---|--------|---|-----|
|        |   | -      | ~ | +   |
| Test B | - | 59     | 1 | 3   |
|        | ~ | 4      | 1 | 1   |
|        | + | 8      | 3 | 156 |

94

95 Cohen's  $\kappa=0.648$ ,  $p<0.001$

Cohen's  $\kappa=0.807$ ,  $p<0.001$

|        |   | Test D |   |     | 96 |
|--------|---|--------|---|-----|----|
|        |   | -      | ~ | +   |    |
| Test A | - | 60     | 4 | 18  | 97 |
|        | ~ | 5      | 0 | 8   |    |
|        | + | 6      | 1 | 134 |    |

100

101 Cohen's  $\kappa=0.636$ ,  $p<0.001$

|        |   | Test D |   |     |
|--------|---|--------|---|-----|
|        |   | -      | ~ | +   |
| Test C | - | 60     | 2 | 4   |
|        | ~ | 1      | 1 | 2   |
|        | + | 10     | 2 | 154 |

Cohen's  $\kappa=0.797$ ,  $p<0.001$



102 (C)

|        |   | Test B |   |    | 103 |
|--------|---|--------|---|----|-----|
|        |   | -      | ~ | +  | 104 |
| Test A | - | 84     | 3 | 12 |     |
|        | ~ | 7      | 1 | 1  |     |
|        | + | 6      | 0 | 20 |     |

|        |   | Test C |   |    |
|--------|---|--------|---|----|
|        |   | -      | ~ | +  |
| Test B | - | 89     | 5 | 3  |
|        | ~ | 2      | 1 | 1  |
|        | + | 4      | 1 | 28 |

107

108 Cohen's  $\kappa=0.479$ ,  $p<0.001$

Cohen's  $\kappa=0.720$ ,  $p<0.001$

109

|        |   | Test C |   |    | 110 |
|--------|---|--------|---|----|-----|
|        |   | -      | ~ | +  | 111 |
| Test A | - | 81     | 6 | 12 |     |
|        | ~ | 8      | 0 | 1  |     |
|        | + | 6      | 1 | 19 |     |

|        |   | Test D |   |    |
|--------|---|--------|---|----|
|        |   | -      | ~ | +  |
| Test B | - | 79     | 0 | 18 |
|        | ~ | 4      | 0 | 0  |
|        | + | 10     | 2 | 21 |

114

115 Cohen's  $\kappa=0.405$ ,  $p<0.001$

Cohen's  $\kappa=0.404$ ,  $p<0.001$

|        |   | Test D |   |    | 116 |
|--------|---|--------|---|----|-----|
|        |   | -      | ~ | +  | 117 |
| Test A | - | 80     | 1 | 18 |     |
|        | ~ | 5      | 0 | 4  |     |
|        | + | 8      | 1 | 17 |     |

120

121 Cohen's  $\kappa=0.358$ ,  $p<0.001$

|        |   | Test D |   |    |
|--------|---|--------|---|----|
|        |   | -      | ~ | +  |
| Test C | - | 82     | 0 | 13 |
|        | ~ | 3      | 0 | 4  |
|        | + | 8      | 2 | 22 |

Cohen's  $\kappa=0.488$ ,  $p<0.001$

122 **Supplementary Table S4.** Sensitivity and specificity of IgM tests to diagnose acute MeV

123 infections when excluding borderline results from calculations.

|                                          |                    | Test A                | Test B                | Test C                | Test D                |
|------------------------------------------|--------------------|-----------------------|-----------------------|-----------------------|-----------------------|
| <b>Overall cohort</b>                    | <b>Sensitivity</b> | 72.6%<br>(66.2-78.2%) | 90.0%<br>(85.1-93.3%) | 86.4%<br>(81.1-90.4%) | 81.0%<br>(75.1-85.7%) |
|                                          | <b>Specificity</b> | 88.6%<br>(82.2-92.8%) | 92.1%<br>(86.6-95.4%) | 90.4%<br>(84.6-94.2%) | 81.1%<br>(74.1-86.5%) |
| <b>Primary infection setting</b>         | <b>Sensitivity</b> | 75.6%<br>(68.8-81.3%) | 89.6%<br>(84.4-93.3%) | 87.6%<br>(82.0-91.6%) | 85.3%<br>(79.4-89.7%) |
|                                          | <b>Specificity</b> | 88.4%<br>(75.5-94.9%) | 93.6%<br>(82.8-97.8%) | 91.5%<br>(80.1-96.6%) | 91.7%<br>(80.5-96.1%) |
| <b>High Anti-MeV-IgG avidity setting</b> | <b>Sensitivity</b> | 53.6%<br>(35.8-70.5%) | 92.3%<br>(75.9-98.6%) | 78.6%<br>(60.5-89.8%) | 51.9%<br>(34.0-69.3%) |
|                                          | <b>Specificity</b> | 88.7%<br>(80.8-93.6%) | 91.4%<br>(84.4-95.4%) | 89.9%<br>(82.4-94.4%) | 76.2%<br>(67.2-83.3%) |
| <b>Number of patients excluded</b>       |                    | 22                    | 11                    | 12                    | 7                     |

131 **Supplementary Table S5.** Diagnostic indices of IgM tests for diagnosing acute MeV infection  
 132 if two tests are combined in the overall cohort, in the primary infection setting and in the  
 133 setting of high Anti-MeV-IgG avidity. Diagnostic indices were calculated grading “borderline”  
 134 results as “negative” and using the cut-offs according to the manufacturer. Two ways of  
 135 combination were analyzed: **(A)** If any of the two tests reported a positive result, the sample  
 136 was graded as positive. **(B)** If both of the two tests reported a positive result, the sample was  
 137 graded as positive.

138 **A**

139

|                                                  |                    | Test A+B           | Test A+C           | Test A+D           | Test B+C           | Test B+D           | Test C+D           |
|--------------------------------------------------|--------------------|--------------------|--------------------|--------------------|--------------------|--------------------|--------------------|
| <b>Overall cohort (n=370)</b>                    | <b>Sensitivity</b> | 87.6% (82.5-91.3%) | 85.8% (80.6-89.9%) | 82.5% (76.9-87.0%) | 88.5% (83.6-92.1%) | 88.0% (83.0-91.7%) | 87.1% (82.0-90.9%) |
|                                                  | <b>Specificity</b> | 86.9% (80.7-91.4%) | 85.0% (78.5-89.8%) | 76.55 (69.2-82.5%) | 88.9% (82.9-93.0%) | 79.7% (72.7-85.3%) | 79.1% (72.0-84.8%) |
| <b>Primary infection setting (n=236)</b>         | <b>Sensitivity</b> | 88.3% (82.9-92.1%) | 87.2% (81.7-91.3%) | 85.6% (79.9-89.9%) | 89.4% (84.1-93.0%) | 88.8% (83.5-92.6%) | 88.8% (83.5-92.6%) |
|                                                  | <b>Specificity</b> | 89.6% (77.8-95.5%) | 87.5% (75.3-94.1%) | 87.5% (75.3-94.1%) | 91.7% (80.5-96.7%) | 91.7% (80.5-96.7%) | 89.6% (77.8-95.5%) |
| <b>High Anti-MeV-IgG avidity setting (n=134)</b> | <b>Sensitivity</b> | 82.8% (65.5-92.4%) | 75.9% (57.9-87.8%) | 62.1% (44.0-77.3%) | 82.8% (65.5-92.4%) | 82.8% (65.5-92.4%) | 75.9% (57.9-87.8%) |
|                                                  | <b>Specificity</b> | 85.7% (77.8-91.2%) | 83.8% (75.6-89.6%) | 71.4% (62.2-79.2%) | 87.6% (80.0-92.6%) | 74.3% (65.2-81.7%) | 74.3% (65.2-81.7%) |

|                                                  |                    | Test A+B           | Test A+C           | Test A+D           | Test B+C           | Test B+D           | Test C+D           |
|--------------------------------------------------|--------------------|--------------------|--------------------|--------------------|--------------------|--------------------|--------------------|
| <b>Overall cohort (n=370)</b>                    | <b>Sensitivity</b> | 68.7% (62.2-74.5%) | 68.7% (62.2-74.5%) | 65.4% (58.9-71.5%) | 83.0% (77.4-87.4%) | 77.0% (80.9-82.1%) | 76.0% (69.9-81.2%) |
|                                                  | <b>Specificity</b> | 94.8% (90.0-97.3%) | 95.4% (90.9-97.8%) | 94.1% (89.2-96.9%) | 94.1% (89.2-96.9%) | 93.5% (88.4-96.4%) | 92.8% (87.6-95.9%) |
| <b>Primary infection setting (n=236)</b>         | <b>Sensitivity</b> | 71.3% (64.4-77.3%) | 71.3% (64.4-77.3%) | 69.7% (62.8-75.8%) | 84.0% (78.1-88.6%) | 81.4% (75.2-86.3%) | 80.3% (74.1-85.4%) |
|                                                  | <b>Specificity</b> | 93.8% (83.2-97.9%) | 93.8% (83.2-97.9%) | 93.8% (83.2-97.9%) | 93.8% (83.2-97.9%) | 93.8% (83.2-97.9%) | 93.8% (83.2-97.9%) |
| <b>High Anti-MeV-IgG avidity setting (n=134)</b> | <b>Sensitivity</b> | 51.7% (34.4-68.6%) | 51.7% (34.4-68.6%) | 37.9% (22.7-56.0%) | 75.9% (57.9-87.8%) | 48.3% (31.4-65.6%) | 48.3% (31.4-65.6%) |
|                                                  | <b>Specificity</b> | 95.2% (89.3-98.0%) | 96.2% (90.6-98.5%) | 94.3% (88.1-97.4%) | 94.3% (88.1-97.4%) | 93.3% (86.9-96.7%) | 92.4% (85.7-96.1%) |

142 **Supplementary Table S6.** Results of IgM tests in patients with negative PCR from serum  
 143 despite positive PCR from any other material. Borderline test results were graded as  
 144 negative for calculation of sensitivity.

|                                                                         |             | Test A | Test B | Test C | Test D |
|-------------------------------------------------------------------------|-------------|--------|--------|--------|--------|
| RT-PCT negative samples (serum) in overall cohort (n=16)                | negative    | 6      | 3      | 4      | 6      |
|                                                                         | borderline  | 0      | 1      | 0      | 0      |
|                                                                         | positive    | 10     | 12     | 12     | 10     |
|                                                                         | Sensitivity | 62.5%  | 75.0%  | 75.0%  | 62.5%  |
| RT-PCT negative samples (serum) In primary infection, Group 1 (n=10)    | negative    | 3      | 2      | 3      | 3      |
|                                                                         | borderline  | 0      | 1      | 0      | 0      |
|                                                                         | positive    | 7      | 7      | 7      | 7      |
|                                                                         | Sensitivity | 70.0%  | 70.0%  | 70.0%  | 70.0%  |
| RT-PCT negative samples (serum) in suspected reinfection, Group 2 (n=6) | negative    | 3      | 1      | 1      | 3      |
|                                                                         | borderline  | 0      | 0      | 0      | 0      |
|                                                                         | positive    | 3      | 5      | 5      | 3      |
|                                                                         | Sensitivity | 50.0%  | 83.5%  | 83.5%  | 50.0%  |

145

146 **Supplementary Figure S1.** Receiver operator characteristic (ROC) analysis of IgM tests to  
147 diagnose acute MeV infections in the overall cohort.

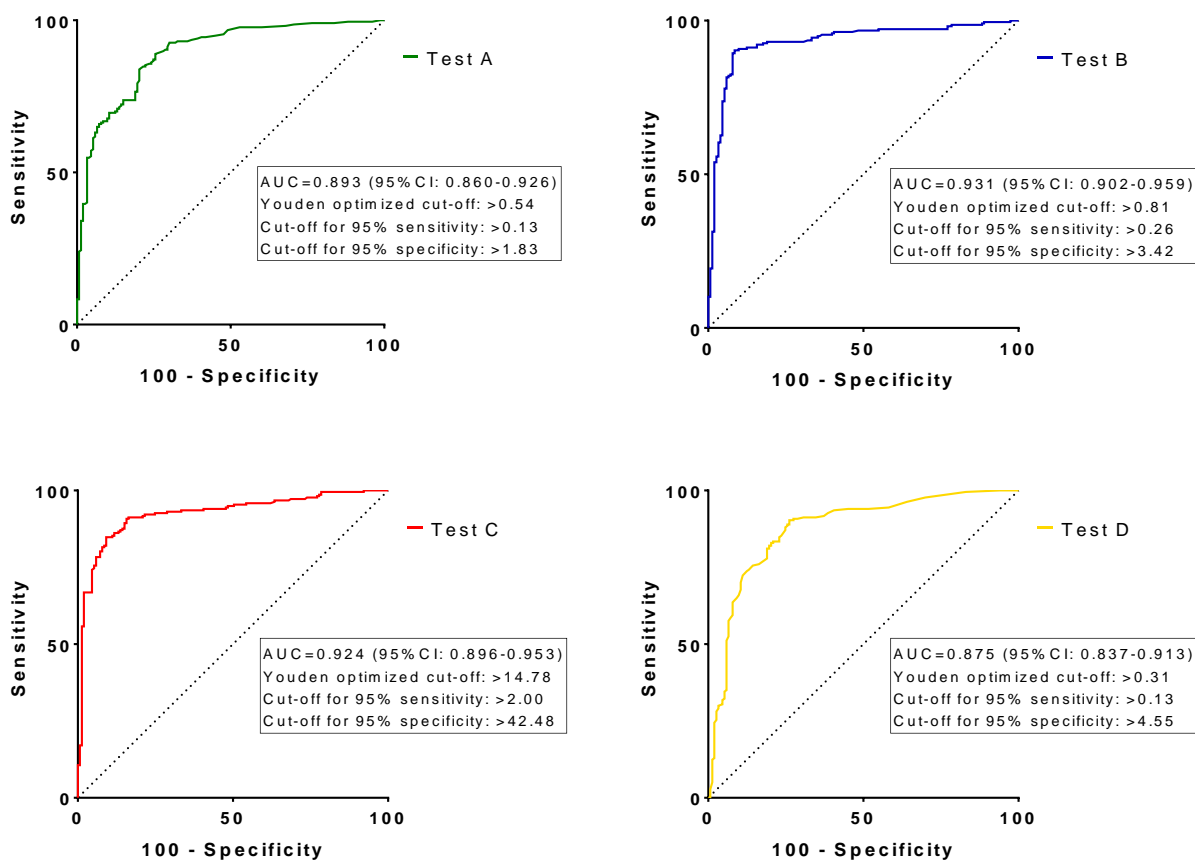

148

149 **Supplementary Figure S2.** Receiver operator characteristic (ROC) analysis of IgM tests to  
150 diagnose acute MeV infections in the primary infection setting.

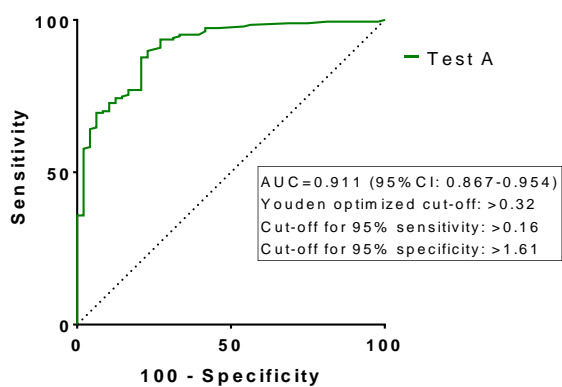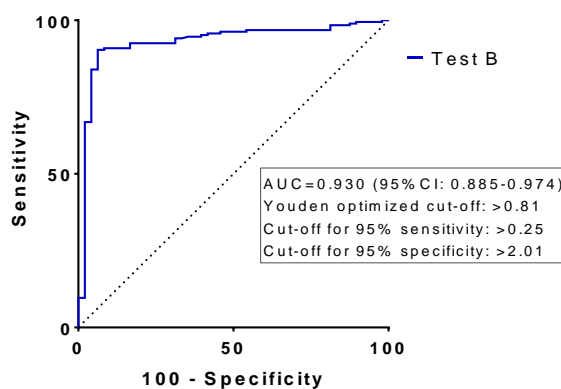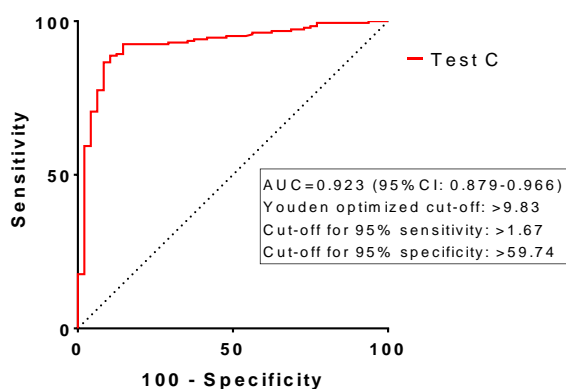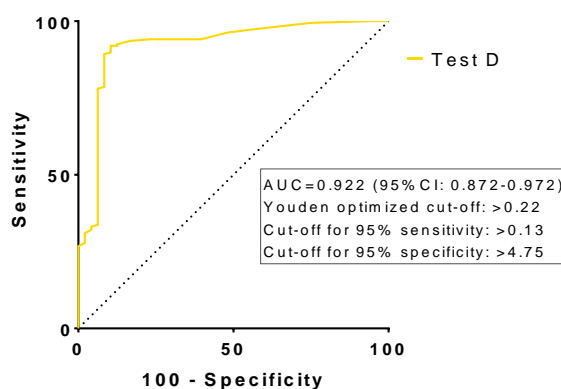

151



152 **Supplementary Figure S3.** Receiver operator characteristic (ROC) analysis of IgM tests to  
153 diagnose acute MeV infections in the high Anti-MeV-IgG avidity setting.

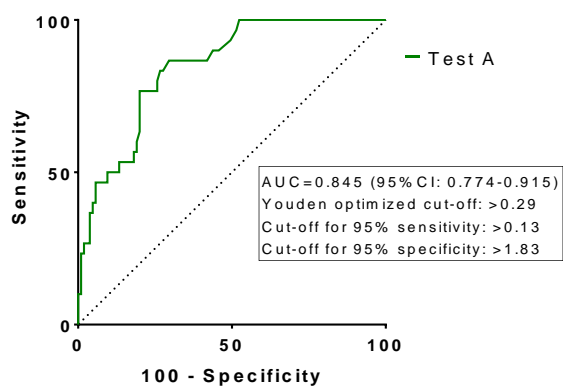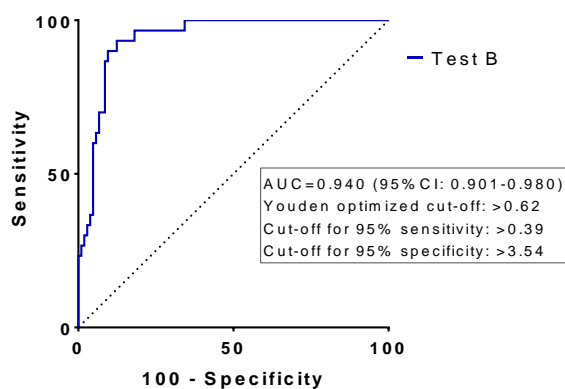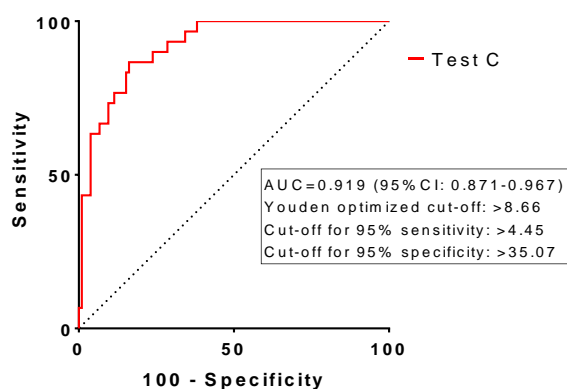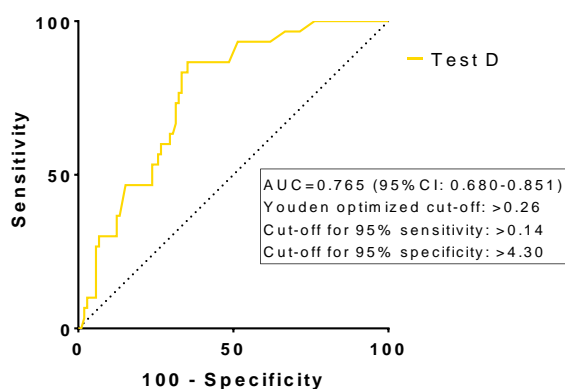

154

155 **Supplementary Figure S4.** Comparison of the strength of antibody response measured  
 156 with each test. Ratios were computed as IgM test values divided by the threshold when  
 157 each test was considered positive for Test A-D. Median results and interquartile ranges of  
 158 Test A-D at different days after onset of rash are displayed.

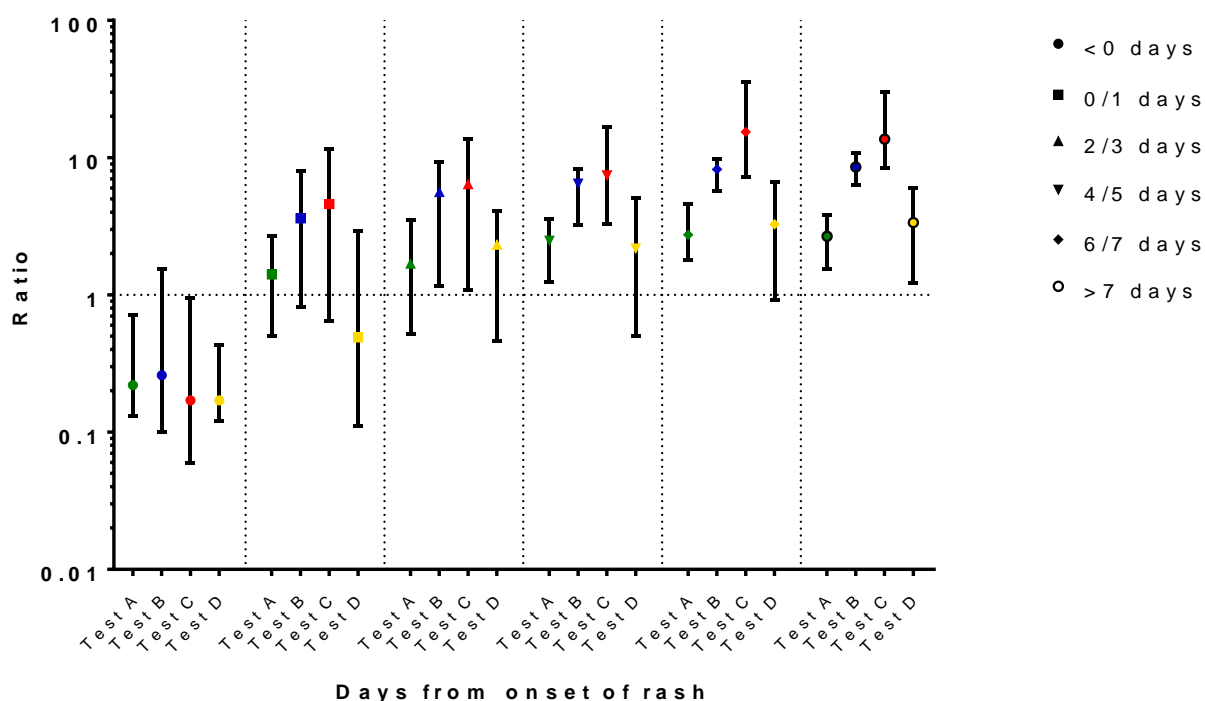

159

160

161 **References for the Supplement**

- 162 1. **Henszel L, Kanitz EE, Grisold A, Holzmann H, Aberle SW, Schmid D.** 2020.  
 163 Vaccination Status and Attitude among Measles Cluster Cases in Austria, 2019. *Int J*  
 164 *Environ Res Public Health* **17**.
- 165 2. **Santibanez S, Tischer A, Heider A, Siedler A, Hengel H.** 2002. Rapid replacement  
 166 of endemic measles virus genotypes. *J Gen Virol* **83**:2699-2708.

- 167 3. **Sundell N, Dotevall L, Sansone M, Andersson M, Lindh M, Wahlberg T, Tyrberg**  
168 **T, Westin J, Liljeqvist J-Å, Bergström T, Studahl M, Andersson L-M.** 2019.  
169 Measles outbreak in Gothenburg urban area, Sweden, 2017 to 2018: low viral load in  
170 breakthrough infections. *Eurosurveillance* **24**:1900114.
